# Supplementary material for: The readily-releasable pool dynamically regulates multivesicular release
Source: eLife journal article supplement (doi:10.7554/elife.47434), 2019-07-31
Supplement: supp [file elife-47434-supp-v1.zip]

Archive with 8 entries (8 files):
- elife_poa_e47434_Transparent_Reporting_File.docx
- elife_poa_e47434_Figure_4_figure_supplement_1.pdf
- elife_poa_e47434_Figure_1_figure_supplement_2.pdf
- elife_poa_e47434_Figure_4_figure_supplement_2.pdf
- elife_poa_e47434_Figure_2_figure_supplement_1.pdf
- elife_poa_e47434_Figure_1_figure_supplement_1.pdf
- elife_poa_e47434_Figure_4_figure_supplement_3.pdf
- elife_poa_e47434_Figure_5_figure_supplement_1.pdf
