# Supplementary figures and images for: The readily-releasable pool dynamically regulates multivesicular release
Source: eLife journal article supplement (doi:10.7554/elife.47434), 2019-07-31

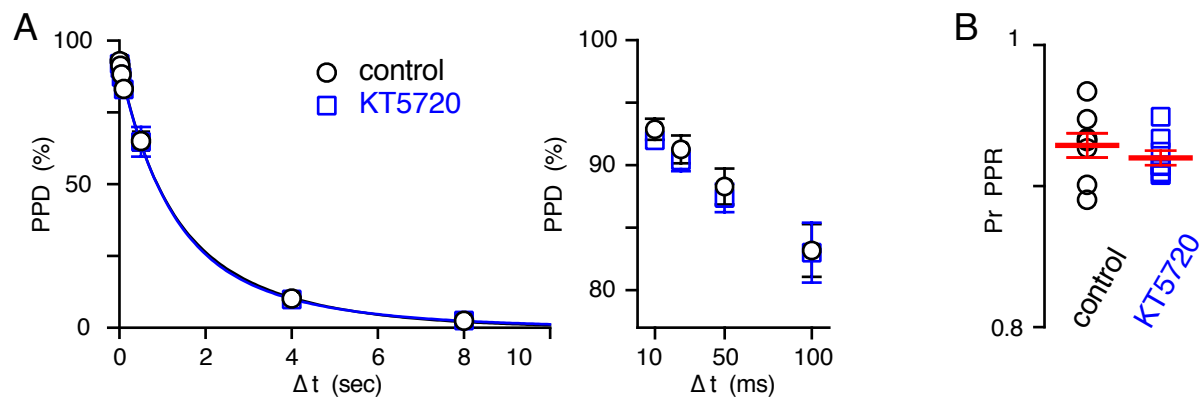

Figure 4 Supplement 1

Supplement: supp [file elife-47434-supp-v1.zip › elife_poa_e47434_Figure_4_figure_supplement_1.pdf]

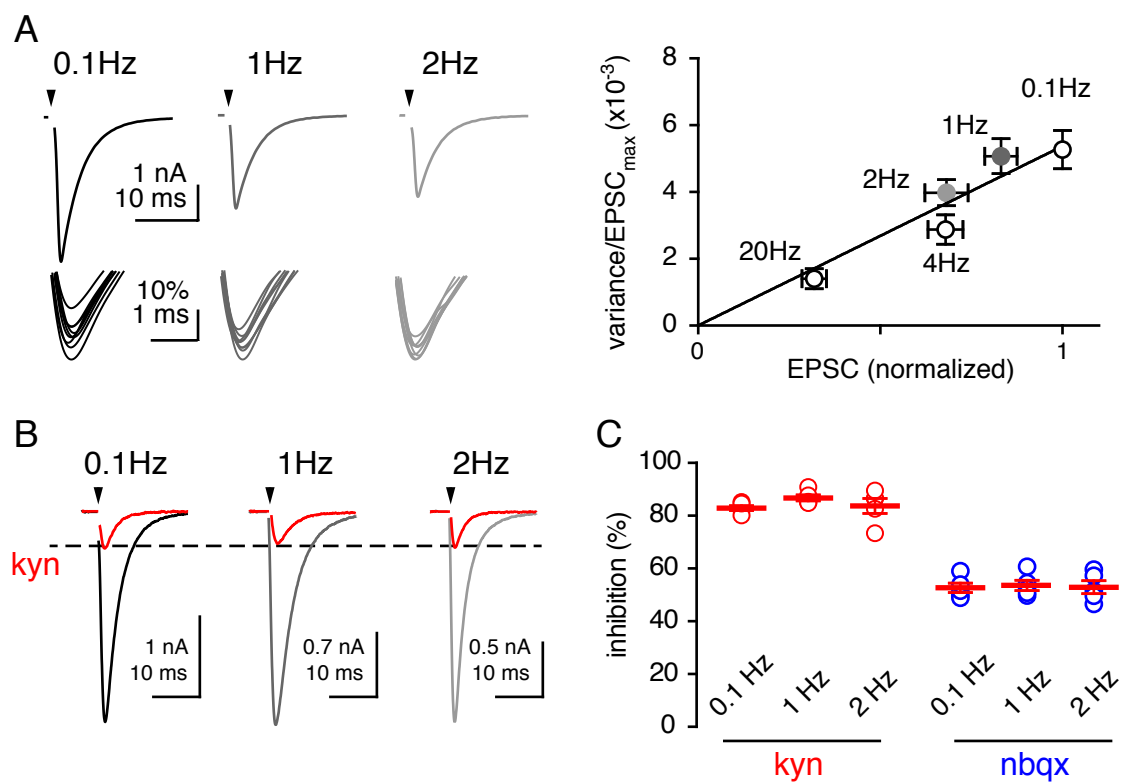

Figure 1 Supplement 2

Supplement: supp [file elife-47434-supp-v1.zip › elife_poa_e47434_Figure_1_figure_supplement_2.pdf]

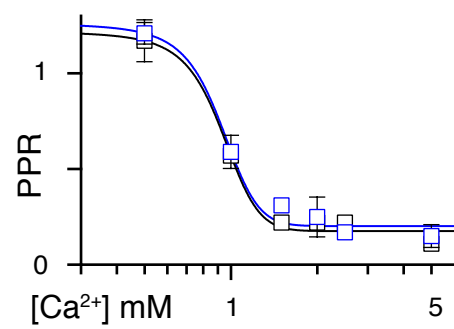

Figure 4 Supplement 2

Supplement: supp [file elife-47434-supp-v1.zip › elife_poa_e47434_Figure_4_figure_supplement_2.pdf]

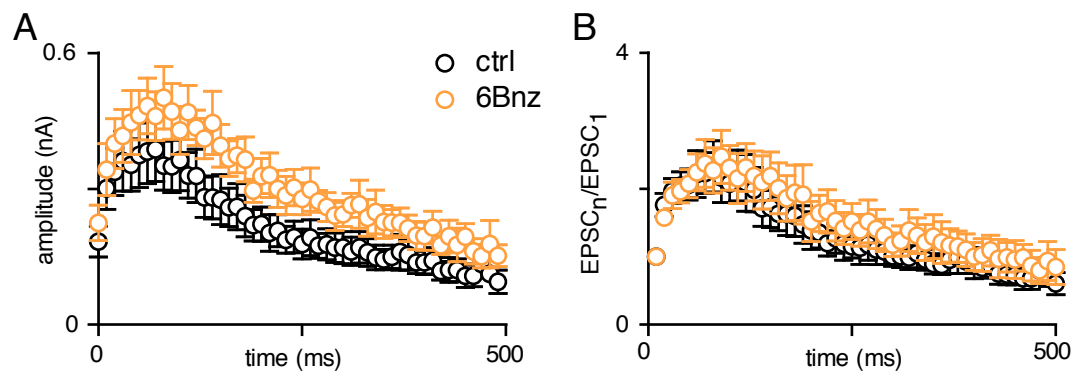

Figure 2 Supplement 1

Supplement: supp [file elife-47434-supp-v1.zip › elife_poa_e47434_Figure_2_figure_supplement_1.pdf]

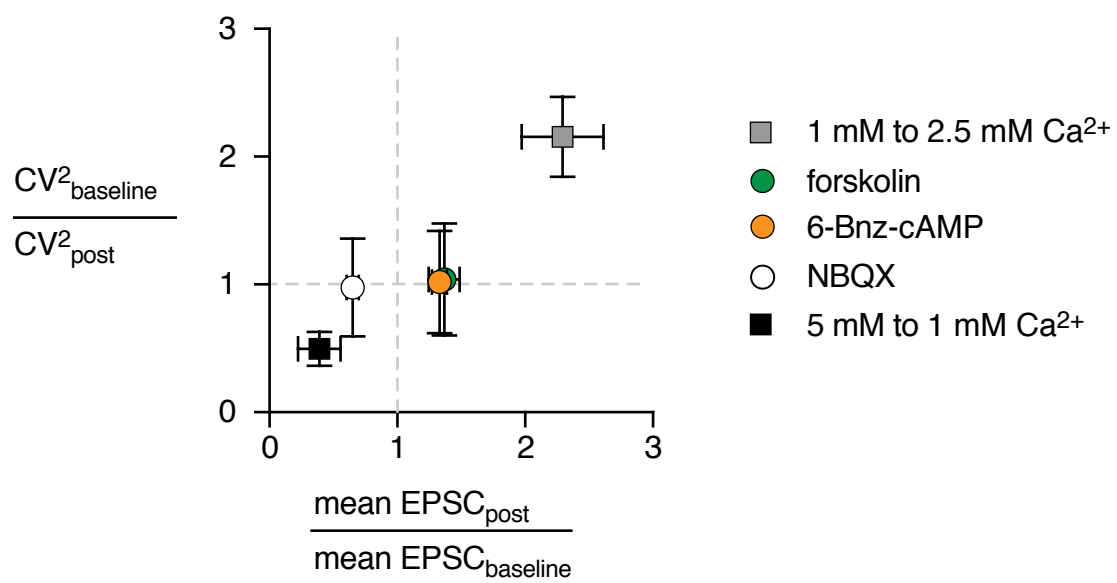

Figure 1 Supplement 1

Supplement: supp [file elife-47434-supp-v1.zip › elife_poa_e47434_Figure_1_figure_supplement_1.pdf]

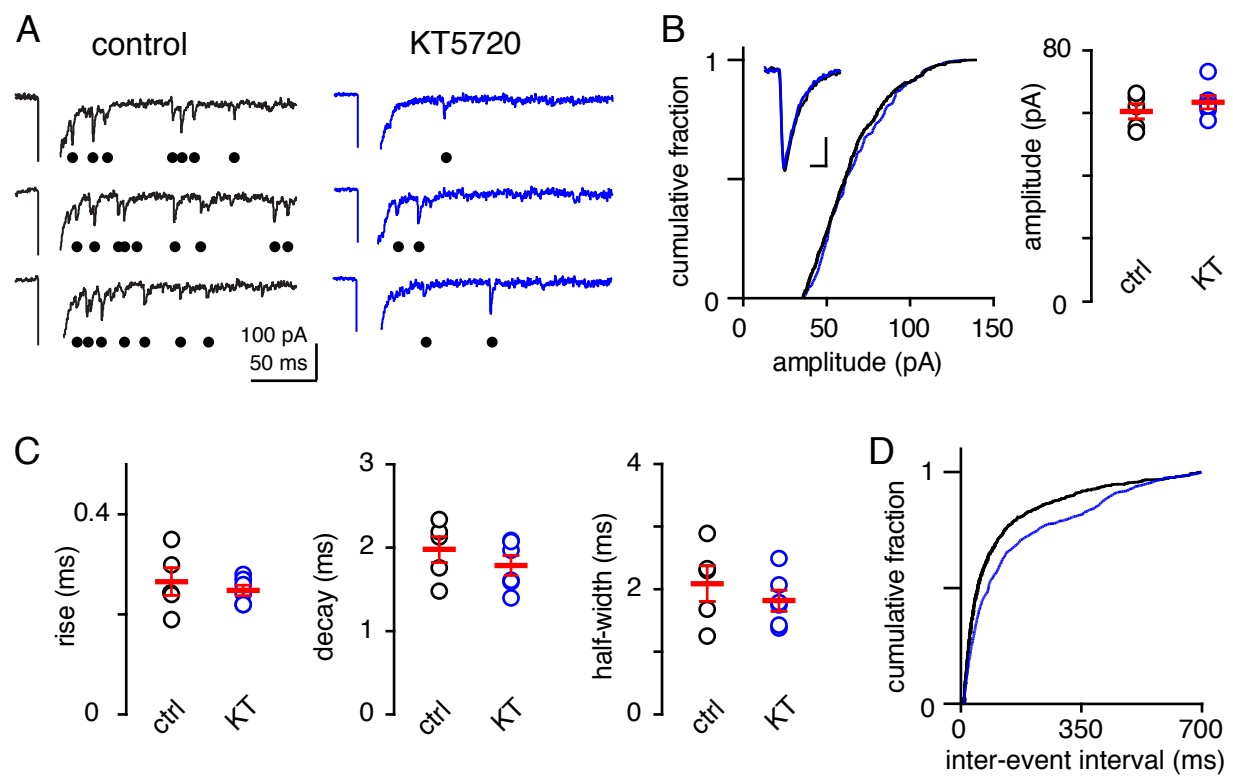

Figure 4 Supplement 3

Supplement: supp [file elife-47434-supp-v1.zip › elife_poa_e47434_Figure_4_figure_supplement_3.pdf]

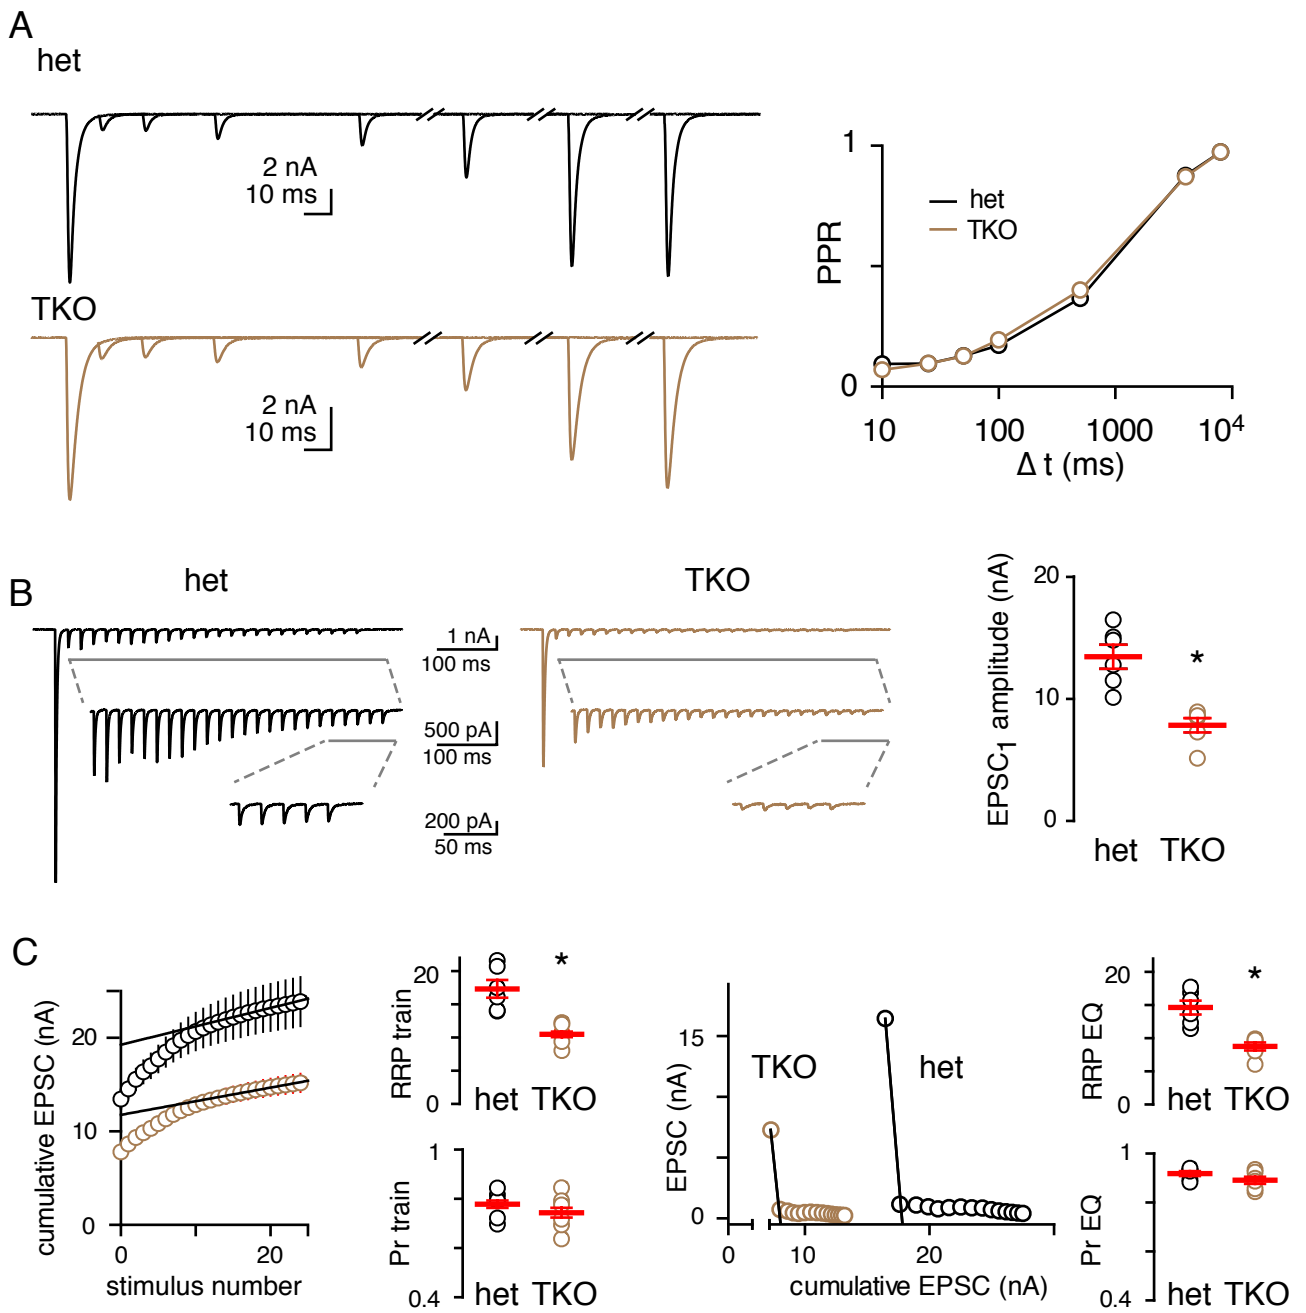

Figure 6 Supplement 1

Supplement: supp [file elife-47434-supp-v1.zip › elife_poa_e47434_Figure_5_figure_supplement_1.pdf]
